# Supplementary material for: Generalizability and reproducibility of functional connectivity in autism
Source: PubMed Central journal article supplement (PMC6591952; doi:10.1186/s13229-019-0273-5), 2019-06-24
Supplement: 13229_2019_273_MOESM1_ESM.pdf [file 13229_2019_273_MOESM1_ESM.pdf]

## Supplementary Information

### Additional File 1. Supplementary Information Results

Supplementary Table 1. List of research sites included in the ABIDE dataset

| <b>ABIDE I Sites</b>  |                                                                                |
|-----------------------|--------------------------------------------------------------------------------|
| KKI                   | Kennedy Krieger Institute                                                      |
| Leuven                | University of Leuven                                                           |
| MaxMun                | Ludwig Maximilian University of Munich                                         |
| NYU                   | New York University Langone Medical Center                                     |
| Pitt                  | University of Pittsburgh School of Medicine                                    |
| SDSU                  | San Diego State University                                                     |
| Trinity               | Trinity Centre for Health Sciences                                             |
| UCLA                  | University of California Los Angeles                                           |
| UM                    | University of Michigan                                                         |
| USM                   | University of Utah School of Medicine                                          |
| Yale                  | Yale Child Study Center                                                        |
| <b>ABIDE II Sites</b> |                                                                                |
| EMC                   | Eramus University Medical Center                                               |
| GU                    | Georgetown University                                                          |
| IP                    | Institut Pasteur and Robert Debré Hospital                                     |
| IU                    | Indiana University                                                             |
| KKI                   | Kennedy Krieger Institute                                                      |
| NYU                   | New York University Langone Medical Center                                     |
| OHSU                  | Oregon Health and Science University                                           |
| ONRC                  | Olin Neuropsychiatry Research Center, Institute of Living at Hartford Hospital |
| SDSU                  | San Diego State University                                                     |
| Stanford              | Stanford University                                                            |
| TCD                   | Trinity Centre for Health Sciences                                             |
| UCD                   | University of California Davis                                                 |
| UCLA                  | University of California Los Angeles                                           |
| USM                   | University of Utah School of Medicine                                          |

Supplementary Table 2. Demographic information for each research site in the ABIDE I dataset

| ABIDE I by Site |     |                 |       |                       |      |       |           |           |      |             |         |      |
|-----------------|-----|-----------------|-------|-----------------------|------|-------|-----------|-----------|------|-------------|---------|------|
|                 | N = |                 |       | Male % (total sample) |      |       | Age (SD)  |           |      | Motion (SD) |         |      |
|                 | ASD | TD <sup>a</sup> | Total | ASD                   | TD   | Total | ASD       | TD        | P    | ASD         | TD      | P    |
| KKI             | 12  | 30              | 42    | 21.4                  | 50.0 | 71.4  | 9.7±1.3   | 10.2±1.3  | .314 | .14±.10     | .11±.04 | .285 |
| Leuven          | 22  | 32              | 54    | 37.0                  | 51.9 | 88.9  | 18.9±5.2  | 18.6±5.0  | .831 | .11±.04     | .11±.03 | .856 |
| MaxMun          | 14  | 24              | 38    | 28.9                  | 55.3 | 84.2  | 26.9±13.9 | 27.0±10.5 | .994 | .09±.08     | .10±.05 | .641 |
| NYU             | 72  | 104             | 176   | 35.2                  | 44.3 | 79.5  | 14.7±7.1  | 15.9±6.2  | .258 | .09±.04     | .08±.04 | .019 |
| Pitt            | 17  | 16              | 33    | 39.4                  | 42.4 | 81.8  | 18.5±7.7  | 17.4±4.6  | .601 | .14±.04     | .14±.03 | .684 |
| SDSU            | 10  | 20              | 30    | 33.3                  | 46.7 | 80.0  | 14.8±1.7  | 14.1±2.0  | .398 | .07±.04     | .08±.04 | .647 |
| Trinity         | 20  | 21              | 41    | 48.8                  | 51.2 | 100.0 | 17.1±2.8  | 17.4±3.8  | .759 | .12±.03     | .10±.02 | .012 |
| UCLA            | 23  | 28              | 51    | 41.2                  | 45.1 | 86.3  | 14.3±2.5  | 13.5±1.9  | .231 | .09±.05     | .09±.07 | .971 |
| UM              | 45  | 72              | 117   | 31.6                  | 47.0 | 78.6  | 13.5±2.3  | 14.8±3.6  | .018 | .11±.06     | .09±.06 | .089 |
| USM             | 46  | 38              | 84    | 54.8                  | 45.2 | 100.0 | 22.6±7.5  | 21.7±7.6  | .595 | .11±.05     | .11±.04 | .561 |
| Yale            | 14  | 13              | 27    | 40.7                  | 37.0 | 77.8  | 12.6±3.2  | 12.9±3.1  | .783 | .14±.05     | .10±.04 | .010 |

<sup>a</sup>Typically Developing controls

Supplementary Table 3. Demographic information for each research site in the ABIDE II dataset

| ABIDE II by Site |     |                 |       |                       |      |       |           |           |      |             |         |      |
|------------------|-----|-----------------|-------|-----------------------|------|-------|-----------|-----------|------|-------------|---------|------|
|                  | N = |                 |       | Male % (total sample) |      |       | Age (SD)  |           |      | Motion (SD) |         |      |
|                  | ASD | TD <sup>a</sup> | Total | ASD                   | TD   | Total | ASD       | TD        | P    | ASD         | TD      | P    |
| EMC              | 15  | 21              | 36    | 36.1                  | 47.2 | 83.3  | 8.6±1.2   | 8.2±1.0   | .212 | .08±.03     | .13±.08 | .013 |
| GU               | 26  | 30              | 56    | 41.1                  | 32.1 | 73.2  | 11.1±1.6  | 10.2±1.7  | .045 | .14±.07     | .11±.04 | .057 |
| IP               | 12  | 25              | 37    | 24.3                  | 21.6 | 45.9  | 16.1±5.4  | 25.3±10.3 | .001 | .09±.05     | .06±.02 | .084 |
| IU               | 14  | 18              | 32    | 37.5                  | 43.8 | 81.3  | 25.8±11.0 | 23.9±5.1  | .570 | .09±.03     | .09±.03 | .486 |
| KKI              | 32  | 122             | 154   | 14.3                  | 52.6 | 66.9  | 10.3±1.4  | 10.4±1.2  | .799 | .14±.05     | .11±.05 | .042 |
| NYU              | 36  | 25              | 61    | 52.5                  | 37.7 | 90.2  | 10.6±6.3  | 9.6±3.6   | .487 | .13±.05     | .10±.05 | .017 |
| OHSU             | 33  | 54              | 87    | 29.9                  | 29.9 | 59.8  | 11.8±2.4  | 10.4±1.6  | .007 | .12±.05     | .10±.05 | .161 |
| ONRC             | 15  | 32              | 47    | 29.8                  | 40.4 | 70.2  | 21.3±4.0  | 23.9±3.5  | .028 | .10±.03     | .10±.04 | .521 |
| SDSU             | 31  | 24              | 55    | 43.6                  | 40.0 | 83.6  | 13.1±3.3  | 13.3±3.1  | .764 | .09±.05     | .08±.05 | .540 |
| Stanford         | 18  | 19              | 37    | 45.9                  | 45.9 | 91.9  | 11.2±1.2  | 11.0±1.3  | .600 | .09±.04     | .08±.04 | .888 |
| TCD              | 14  | 18              | 32    | 43.8                  | 56.3 | 100.0 | 15.3±3.5  | 16.3±2.8  | .367 | .14±.06     | .11±.05 | .193 |
| UCD              | 16  | 11              | 27    | 48.1                  | 25.9 | 74.1  | 14.9±2.0  | 15.2±1.5  | .692 | .11±.06     | .09±.03 | .246 |
| UCLA             | 11  | 12              | 23    | 47.8                  | 34.8 | 82.6  | 12.2±1.7  | 10.0±2.3  | .013 | .10±.03     | .10±.06 | .881 |
| USM              | 11  | 14              | 25    | 36.0                  | 44.0 | 80.0  | 19.4±8.0  | 24.0±7.3  | .150 | .16±.10     | .10±.04 | .092 |

<sup>a</sup>Typically Developing controls

Supplementary Table 4. Behavioral information for the combined ABIDE dataset

|                                 | Autism   |                | TD <sup>a</sup> |                | <i>P</i> |
|---------------------------------|----------|----------------|-----------------|----------------|----------|
|                                 | <i>N</i> | Mean (SD)      | <i>N</i>        | Mean (SD)      |          |
| VIQ <sup>b</sup>                | 480      | 105.70 (17.93) | 635             | 113.85 (13.48) | <.001    |
| PIQ <sup>c</sup>                | 493      | 105.18 (17.06) | 686             | 109.43 (13.64) | <.001    |
| FIQ <sup>d</sup>                | 544      | 106.05 (16.79) | 757             | 113.03 (12.53) | <.001    |
| ADI <sup>e</sup> Social         | 379      | 19.40 (5.57)   | 0               | -              | -        |
| ADI Verbal                      | 379      | 15.40 (4.61)   | 0               | -              | -        |
| ADI RRB                         | 380      | 5.86 (2.52)    | 0               | -              | -        |
| ADI Onset                       | 327      | 3.16 (1.31)    | 0               | -              | -        |
| ADOS <sup>f</sup> Social Affect | 319      | 9.43 (3.80)    | 16              | 1.13 (1.45)    | <.001    |
| ADOS RRB                        | 319      | 3.10 (1.80)    | 16              | 0.31 (0.79)    | <.001    |
| ADOS Total                      | 324      | 12.53 (4.53)   | 16              | 1.44 (1.50)    | <.001    |
| ADOS Comparison Score           | 322      | 7.05 (2.02)    | 16              | 1.13 (0.50)    | <.001    |
| SRS <sup>g</sup> Raw Awareness  | 222      | 11.99 (3.99)   | 312             | 4.37 (2.81)    | <.001    |
| SRS Cognition                   | 222      | 16.53 (5.98)   | 312             | 3.29 (3.24)    | <.001    |
| SRS Communication               | 222      | 31.20 (10.68)  | 312             | 6.28 (5.73)    | <.001    |
| SRS Motivation                  | 222      | 15.22 (6.08)   | 312             | 4.33 (3.70)    | <.001    |
| SRS Mannerisms                  | 222      | 17.80 (6.76)   | 312             | 2.48 (2.99)    | <.001    |
| SRS Raw Total                   | 352      | 92.82 (29.72)  | 432             | 20.24 (14.96)  | <.001    |

<sup>a</sup>Typically Developing controls; <sup>b</sup>Verbal IQ; <sup>c</sup>Performance IQ; <sup>d</sup>Full-scale IQ;

<sup>e</sup>Autism Diagnostic Interview; <sup>f</sup>Autism Diagnostic Observation Schedule; <sup>g</sup>Social Responsiveness Scale

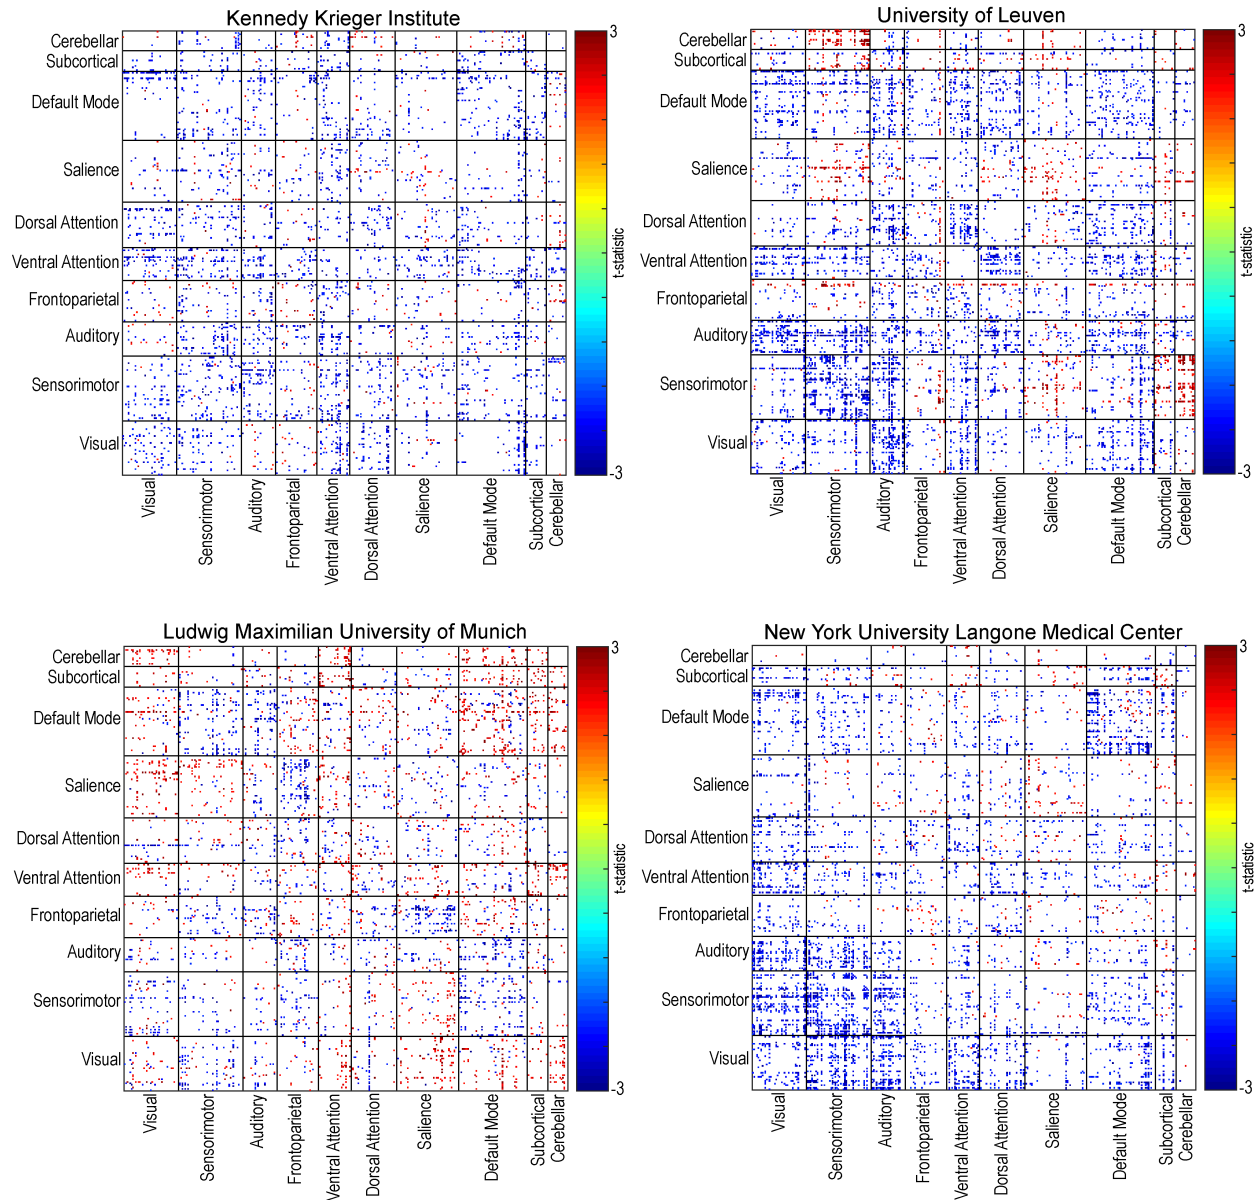

Supplementary Figure 1. ABIDE I resting-state functional connectivity (KKI, Leuven, MaxMun, NYU). Distribution of between-group resting-state findings for a 361 region of interest parcellation in four ABIDE I research sites. Between-group differences were calculated using a general linear model controlling for age, sex, and mean head motion (uncorrected,  $p < .05$ ). Cooler colors represent autism < controls.



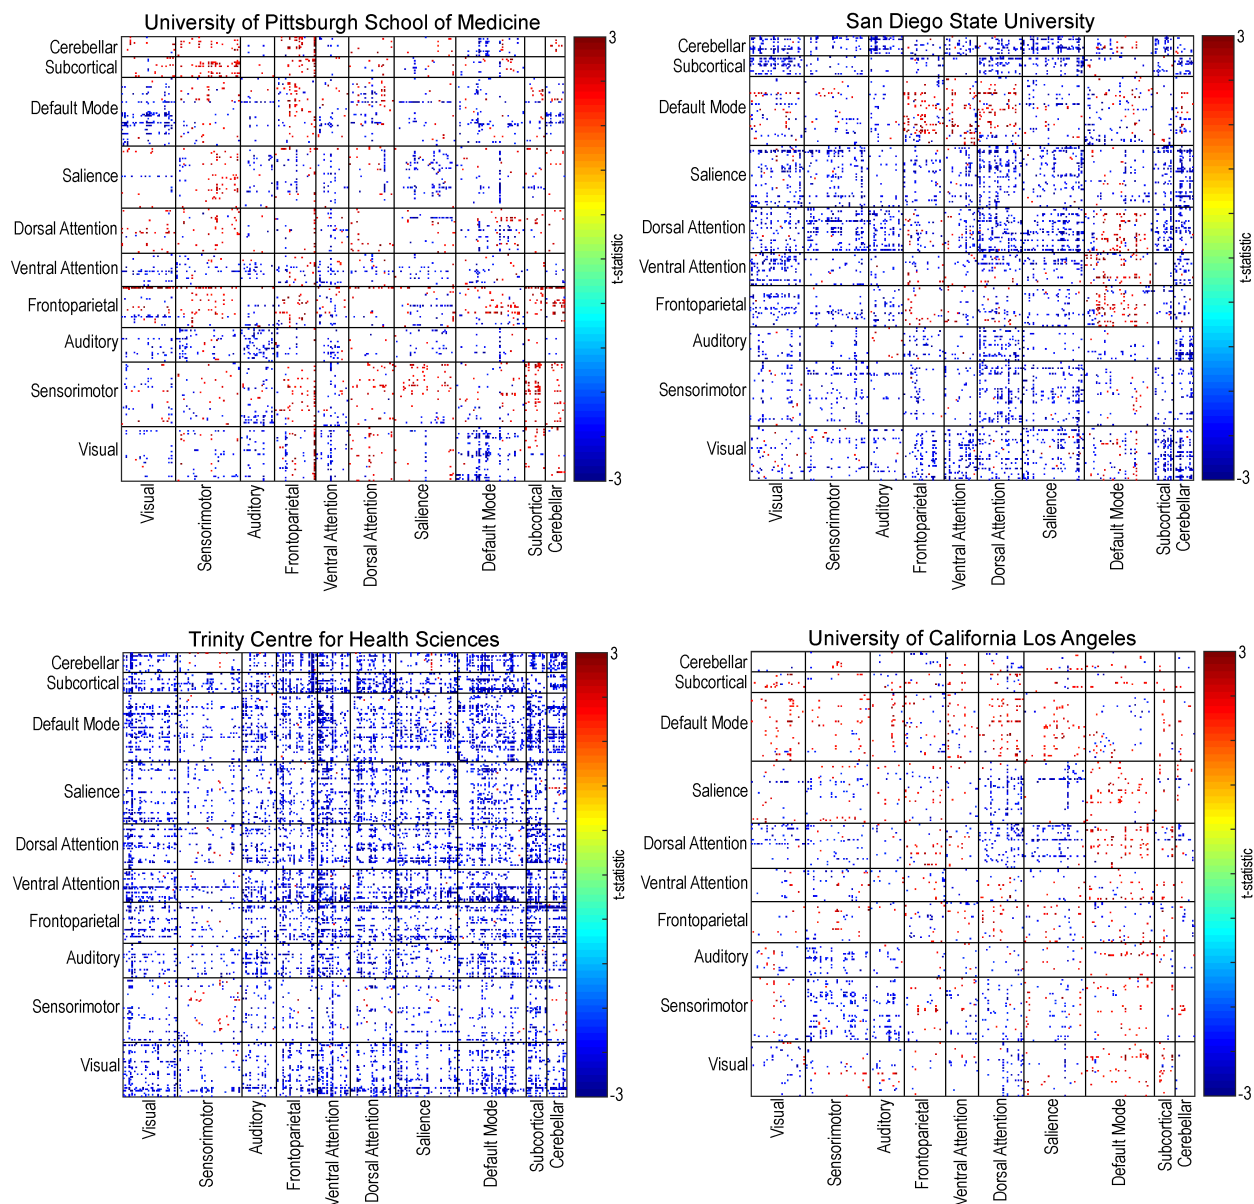

Supplementary Figure 2. ABIDE I resting-state functional connectivity (Pitt, SDSU, Trinity, UCLA). Distribution of between-group resting-state findings for a 361 region of interest parcellation in four ABIDE I research sites. Between-group differences were calculated using a general linear model controlling for age, sex, and mean head motion (uncorrected,  $p < .05$ ). Cooler colors represent autism < controls.

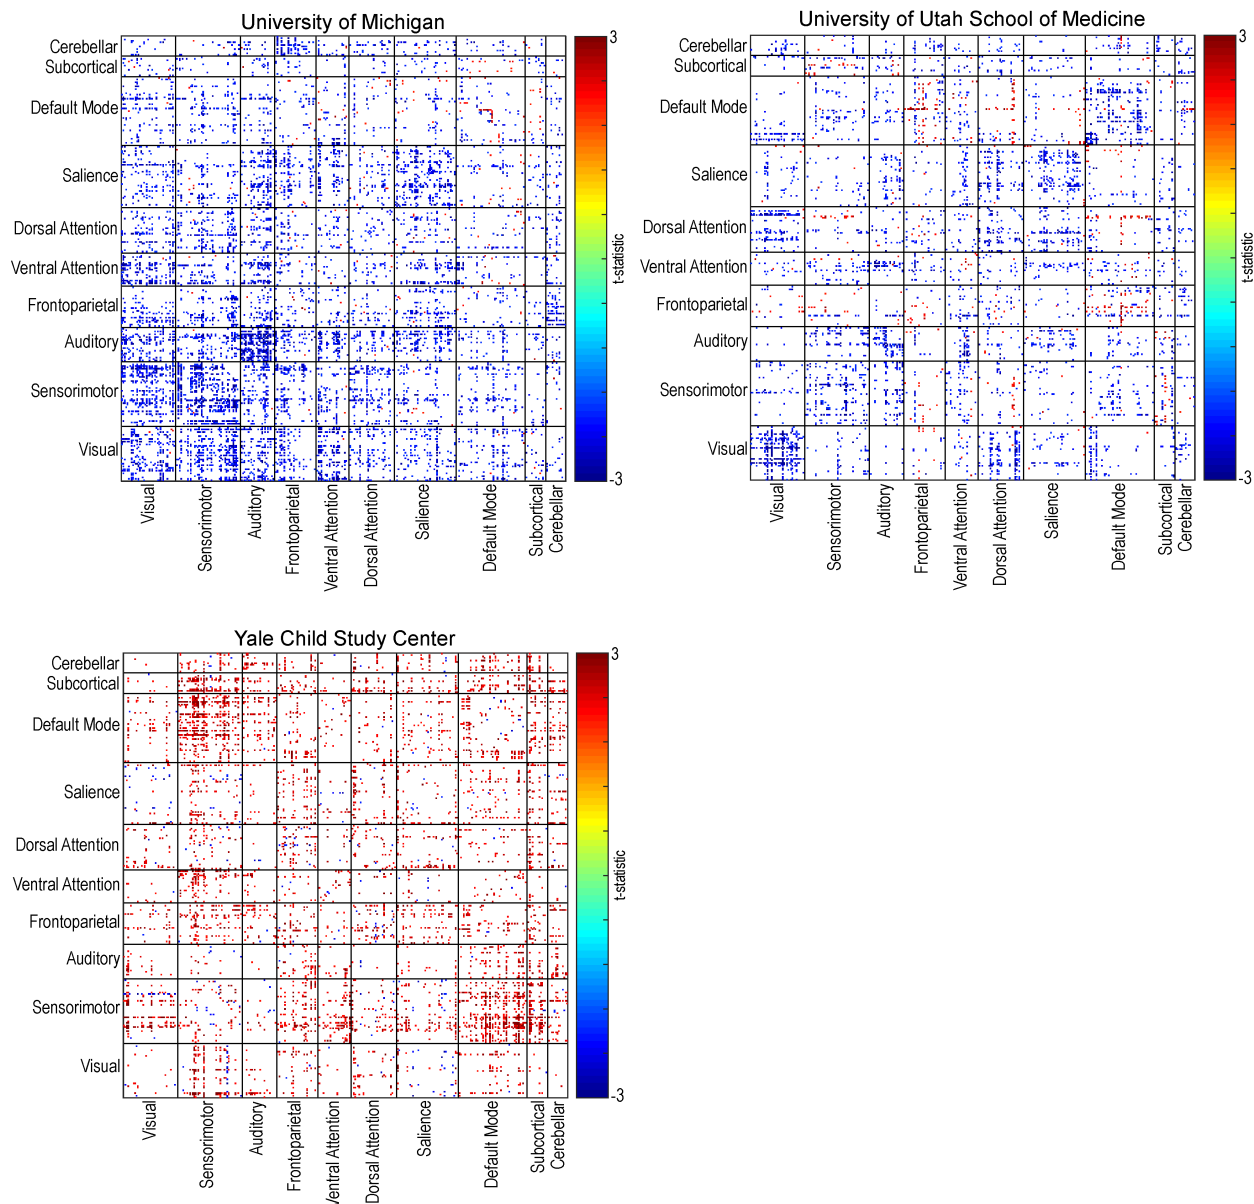

Supplementary Figure 3. ABIDE I resting-state functional connectivity (UM, USM, Yale). Distribution of between-group resting-state findings for a 361 region of interest parcellation in three ABIDE I research sites. Between-group differences were calculated using a general linear model controlling for age, sex, and mean head motion (uncorrected,  $p < .05$ ). Cooler colors represent autism < controls.

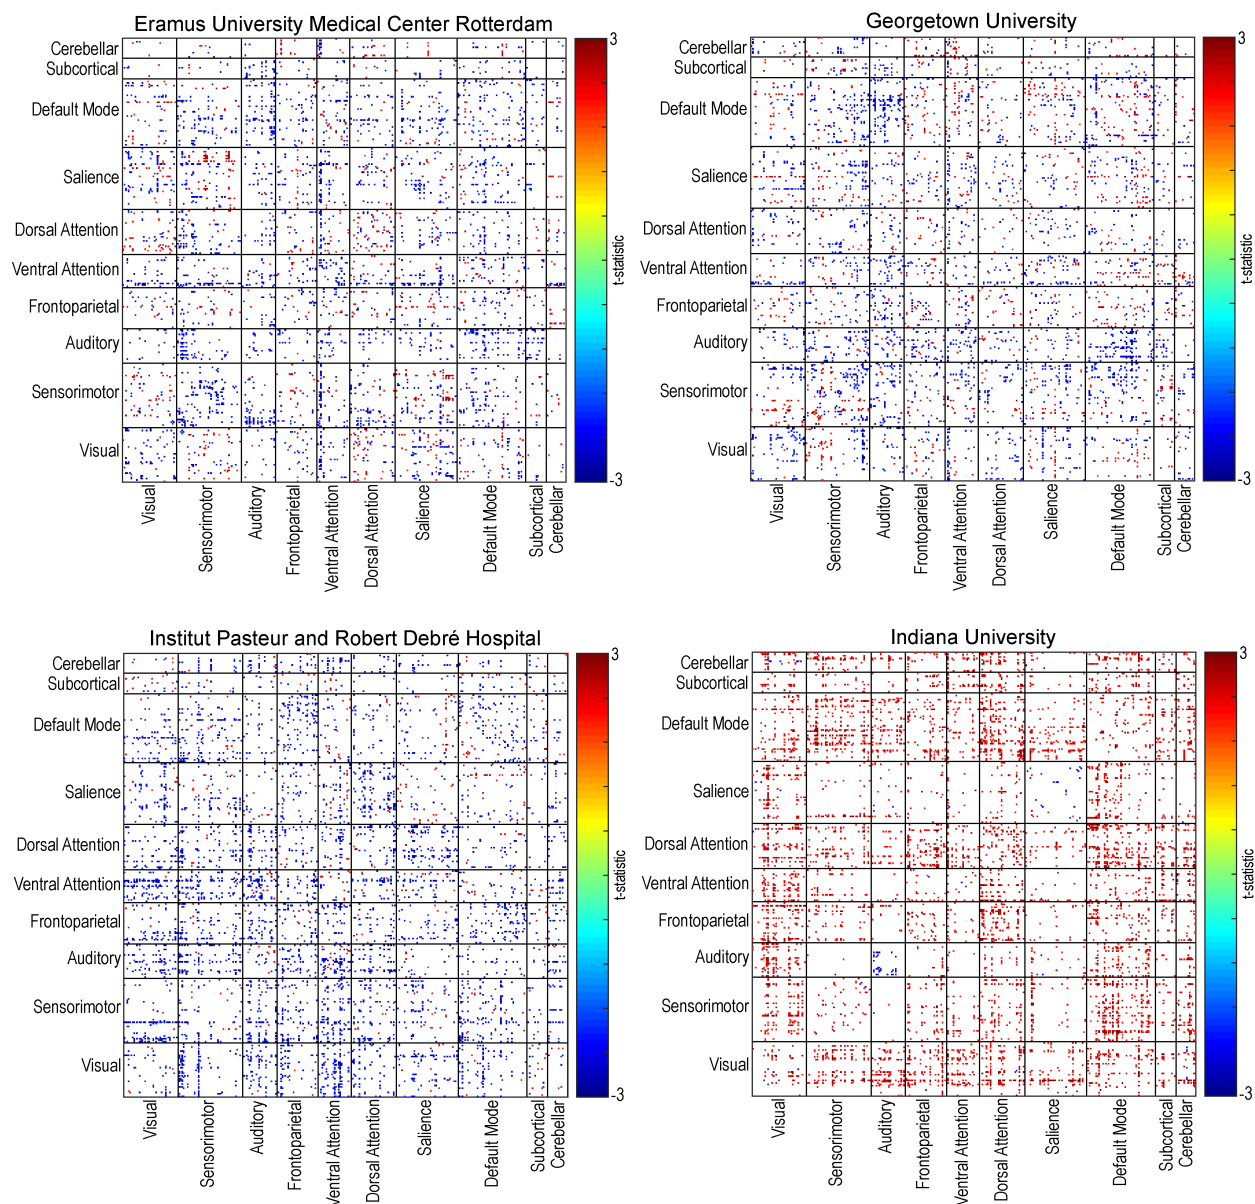

Supplementary Figure 4. ABIDE II resting-state functional connectivity (EMC, GU, IP, IU). Distribution of between-group resting-state findings for a 361 region of interest parcellation in four ABIDE I research sites. Between-group differences were calculated using a general linear model controlling for age, sex, and mean head motion (uncorrected,  $p < .05$ ). Cooler colors represent autism < controls.

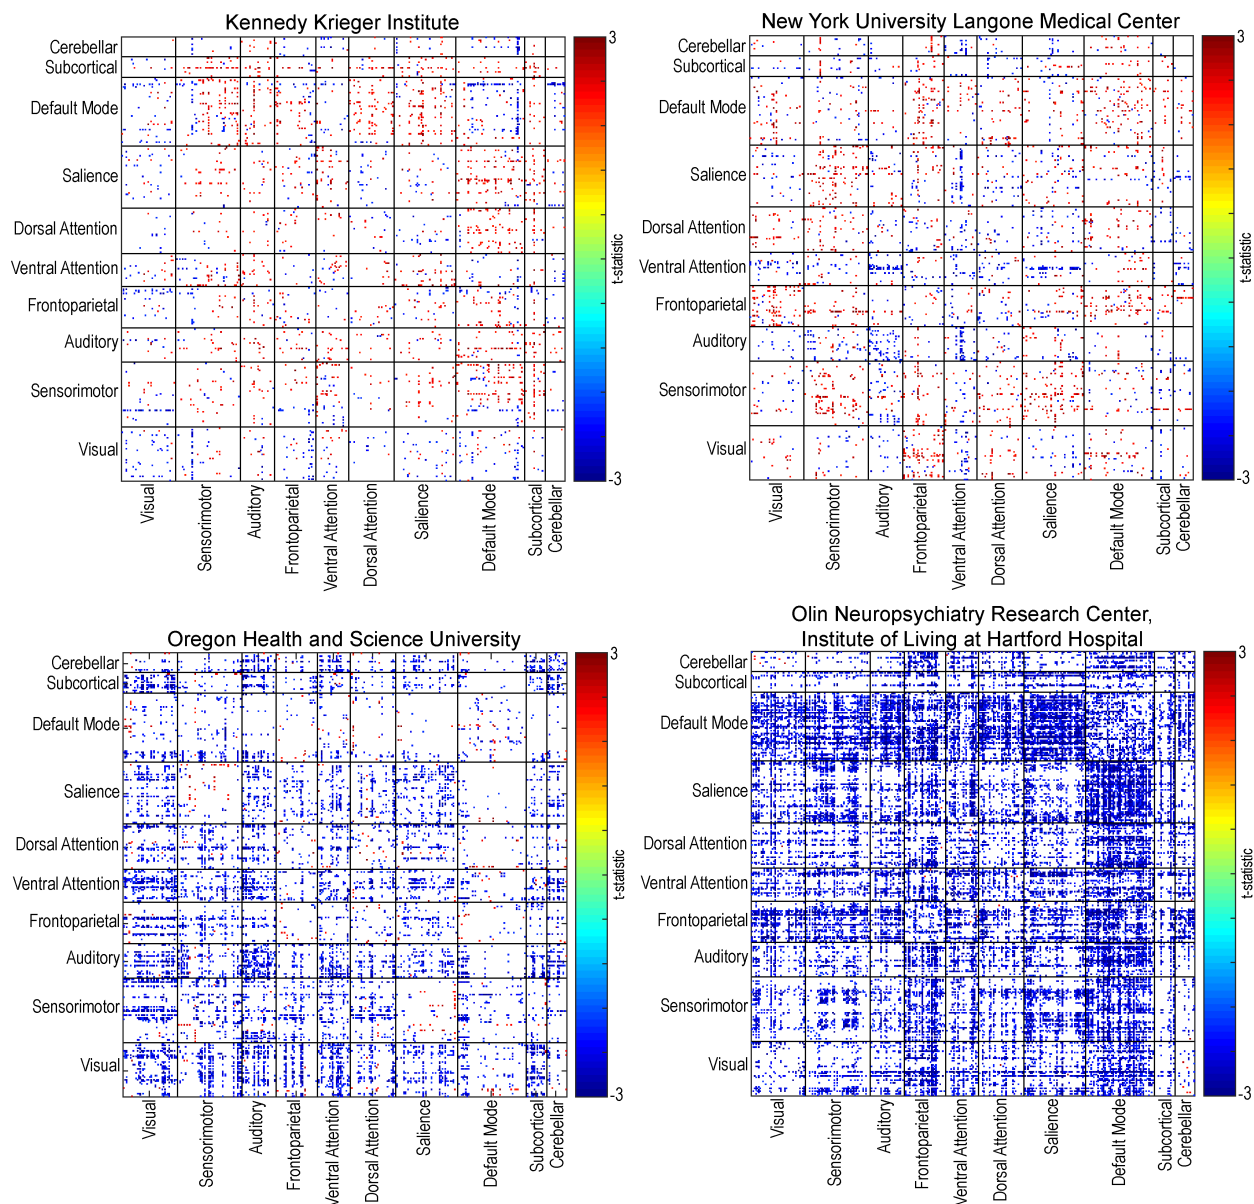

Supplementary Figure 5. ABIDE II resting-state functional connectivity (KKI, NYU, OHSU, ONRC). Distribution of between-group resting-state findings for a 361 region of interest parcellation in four ABIDE I research sites. Between-group differences were calculated using a general linear model controlling for age, sex, and mean head motion (uncorrected,  $p < .05$ ). Cooler colors represent autism < controls.

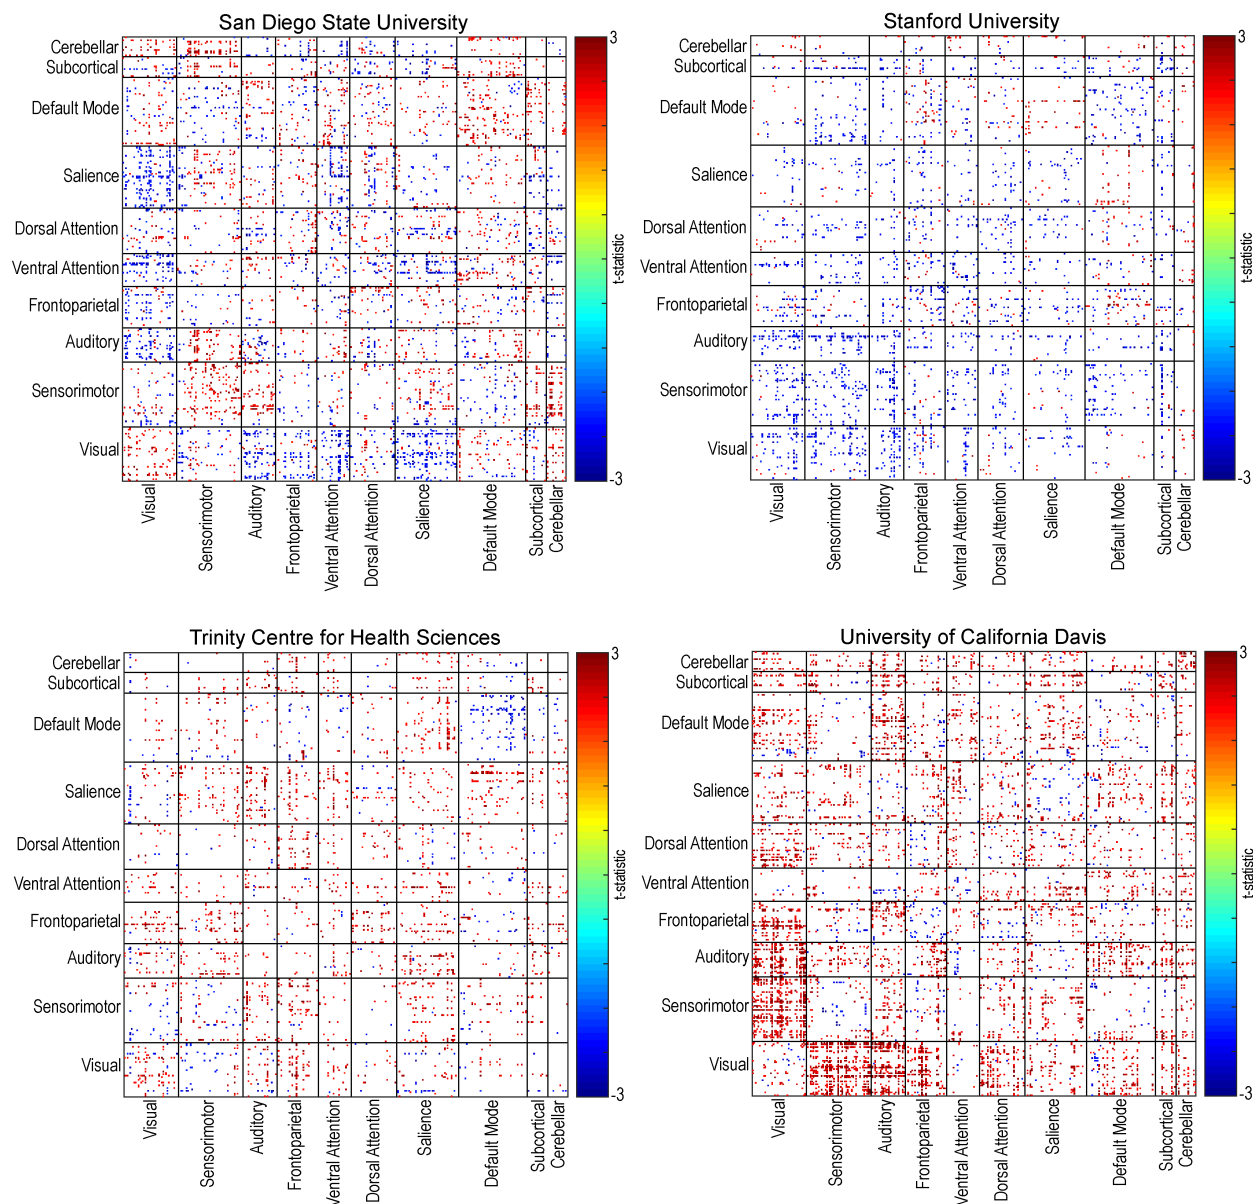

Supplementary Figure 6. ABIDE II resting-state functional connectivity (SDSU, Stanford, TCD, UCD). Distribution of between-group resting-state findings for a 361 region of interest parcellation in four ABIDE I research sites. Between-group differences were calculated using a general linear model controlling for age, sex, and mean head motion (uncorrected,  $p < .05$ ). Cooler colors represent autism < controls.



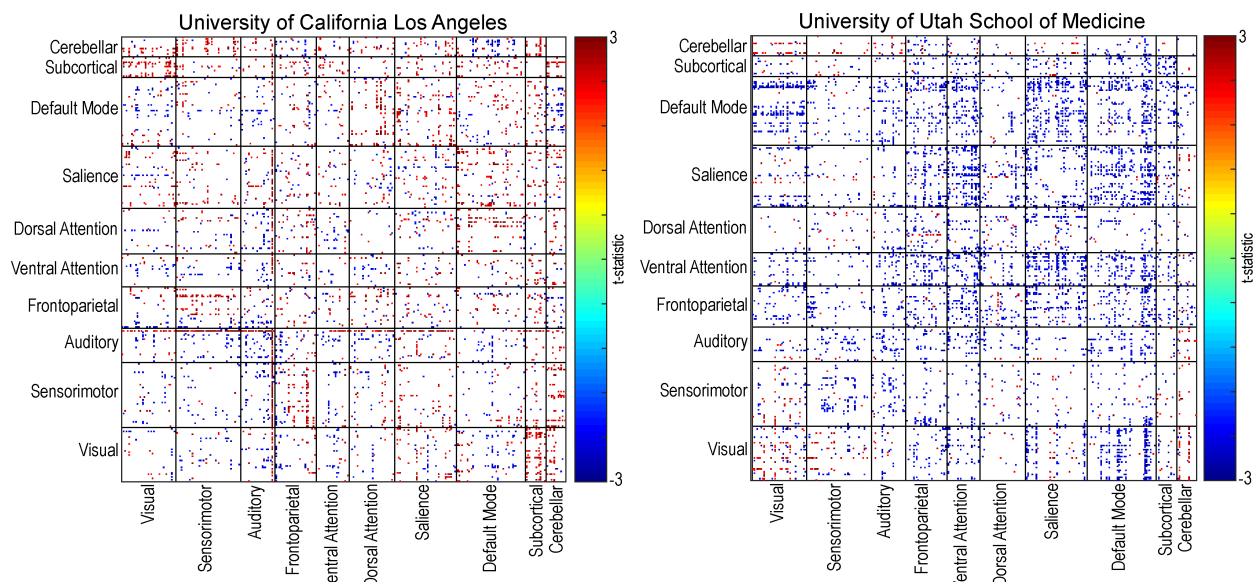

Supplementary Figure 7. ABIDE II resting-state functional connectivity (UCLA, USM). Distribution of between-group resting-state findings for a 361 region of interest parcellation in four ABIDE I research sites. Between-group differences were calculated using a general linear model controlling for age, sex, and mean head motion (uncorrected,  $p < .05$ ). Cooler colors represent autism < controls.

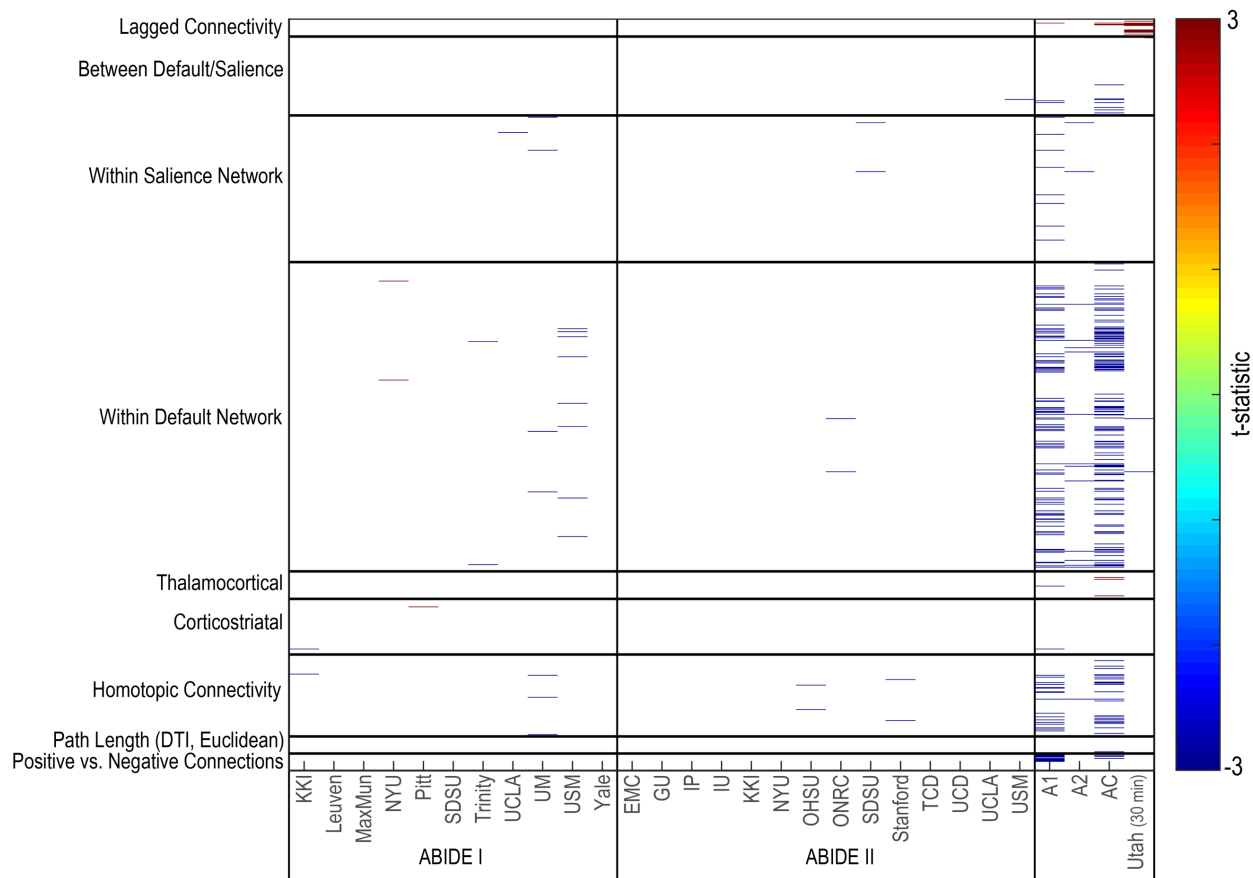

Supplementary Figure 8. Between-group comparison of resting-state functional connectivity methods. Distribution of between-group resting-state findings for select methods are presented ( $q[FDR] < .05$ , corrected) for each research site, ABIDE I, ABIDE II, a combined ABIDE dataset, and a high temporal resolution replication sample (Utah cohort). Cooler colors represent autism < controls.

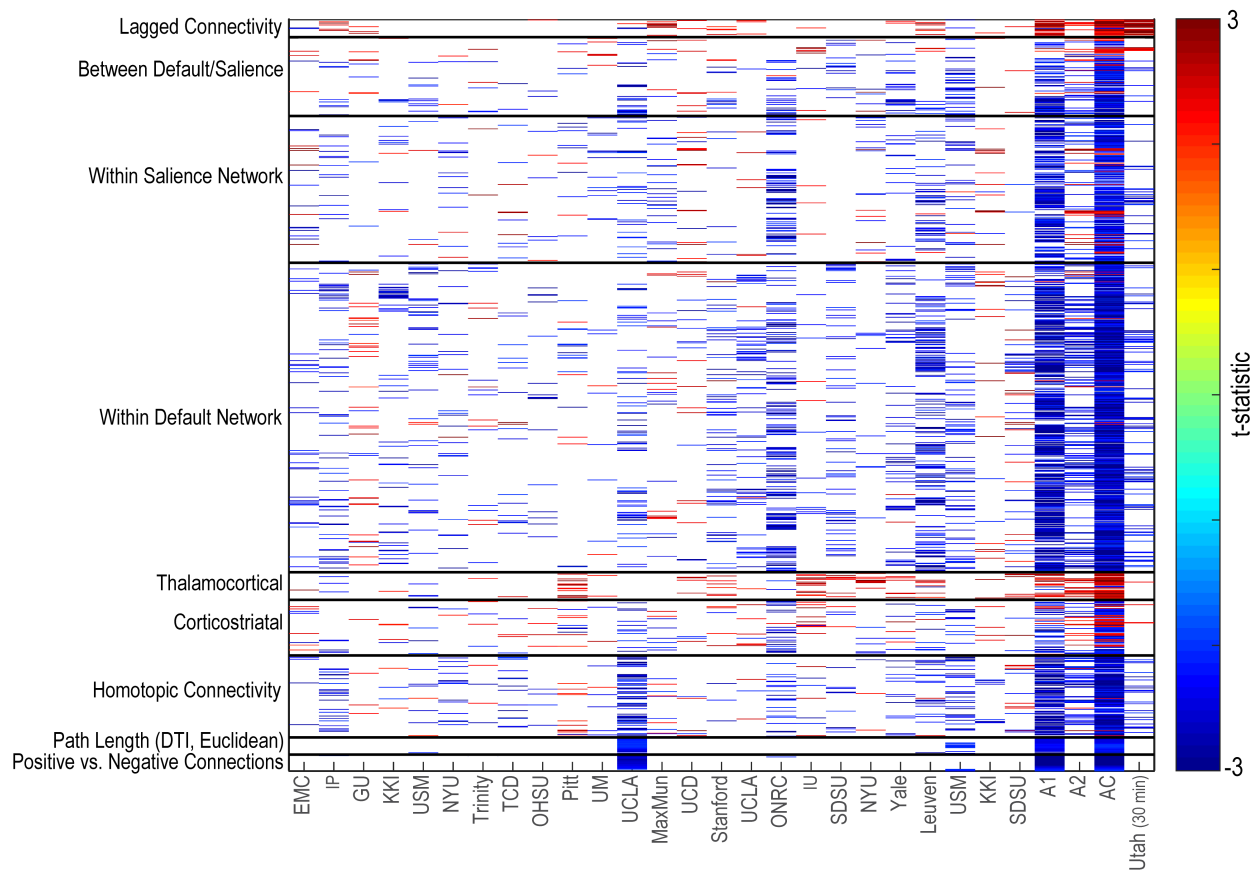

Supplementary Figure 9. Between-group comparison of resting-state functional connectivity methods sorted by age (low to high). Distribution of between-group resting-state findings for select methods are presented ( $p < .05$ , uncorrected) for each research site, ABIDE I, ABIDE II, a combined ABIDE dataset, and a high temporal resolution replication sample (Utah cohort). Cooler colors represent autism < controls.



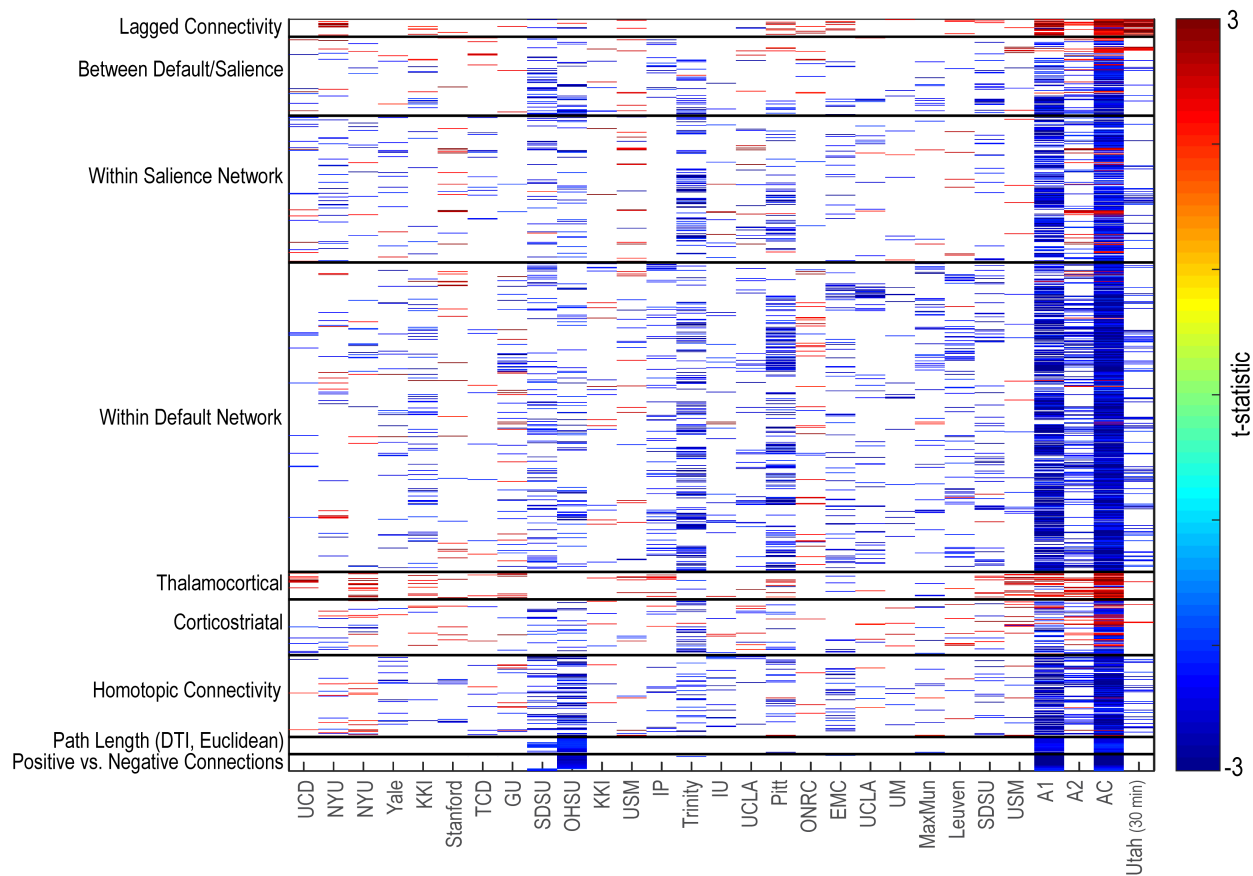

Supplementary Figure 10. Between-group comparison of resting-state functional connectivity methods sorted by motion (low to high). Distribution of between-group resting-state findings for select methods are presented ( $p < .05$ , uncorrected) for each research site, ABIDE I, ABIDE II, a combined ABIDE dataset, and a high temporal resolution replication sample (Utah cohort). Cooler colors represent autism < controls.

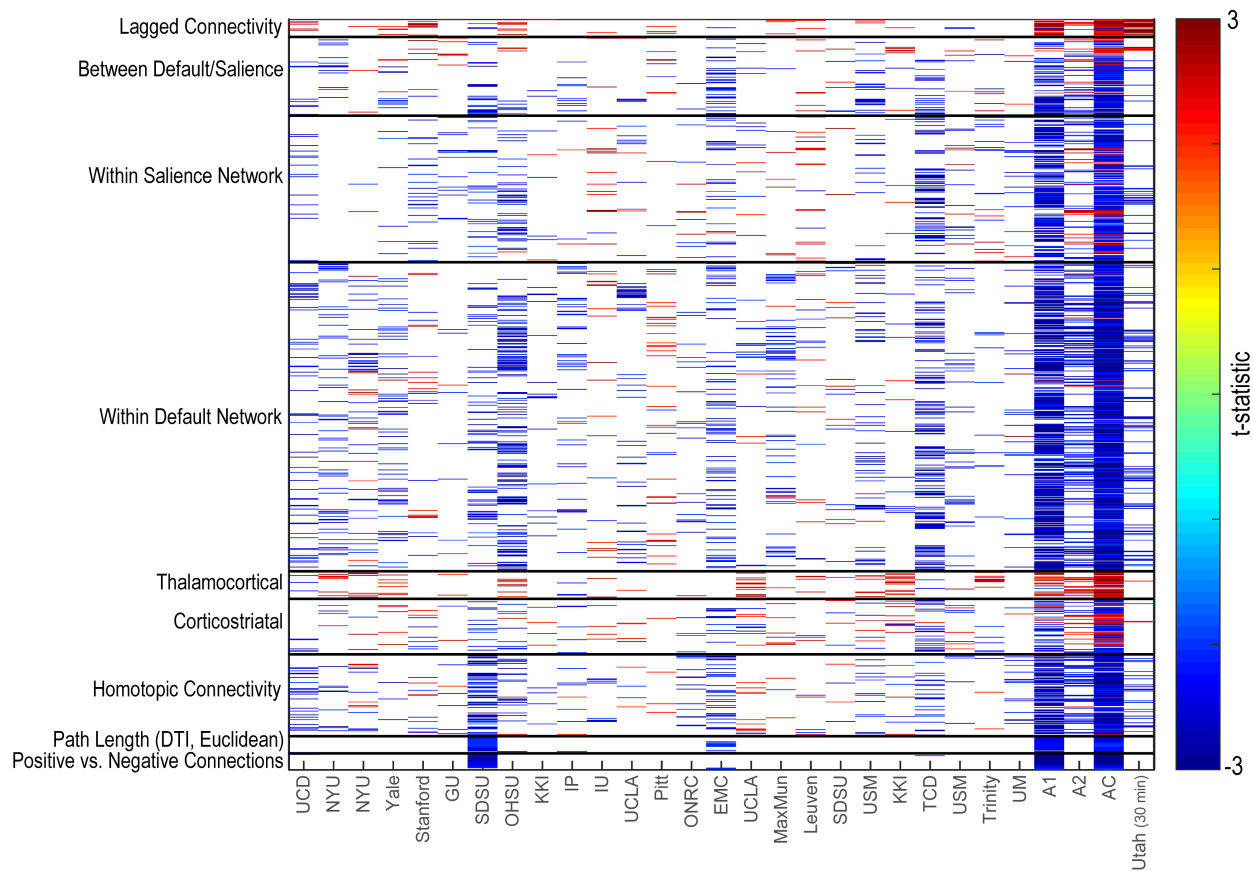

Supplementary Figure 11. Between-group comparison of resting-state functional connectivity methods sorted by eye status (open/closed). Distribution of between-group resting-state findings for select methods are presented ( $p < .05$ , uncorrected) for each research site, ABIDE I, ABIDE II, a combined ABIDE dataset, and a high temporal resolution replication sample (Utah cohort). Cooler colors represent autism < controls.

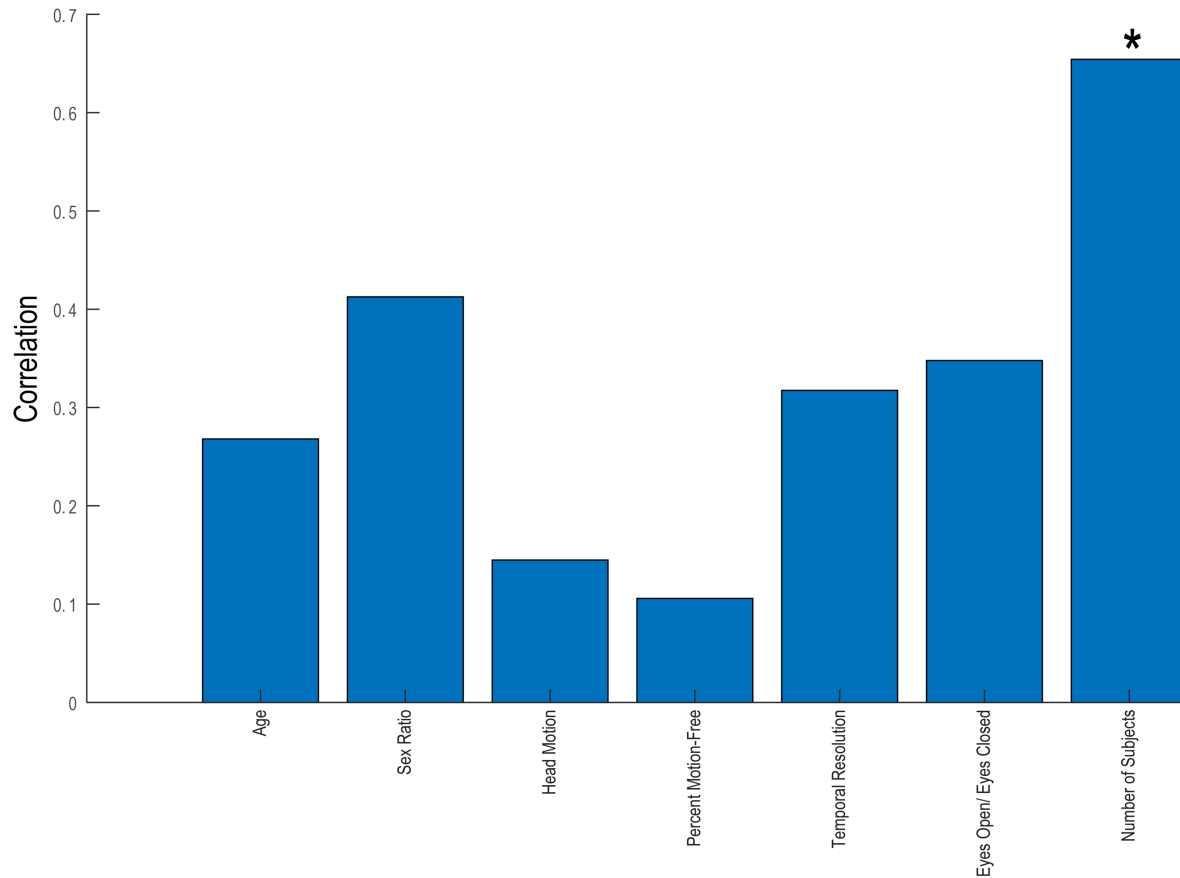

Supplementary Figure 12. Correlation between site specific factors and combined ABIDE results. The sample size of each site was the sole significant (\*) factor that predicted the similarity of between-group comparison of resting-state functional connectivity methods from each site to the findings for the combined ABIDE sample.
